# Supplementary material
Source: PubMed Central journal article supplement (PMC2741718)

Boys

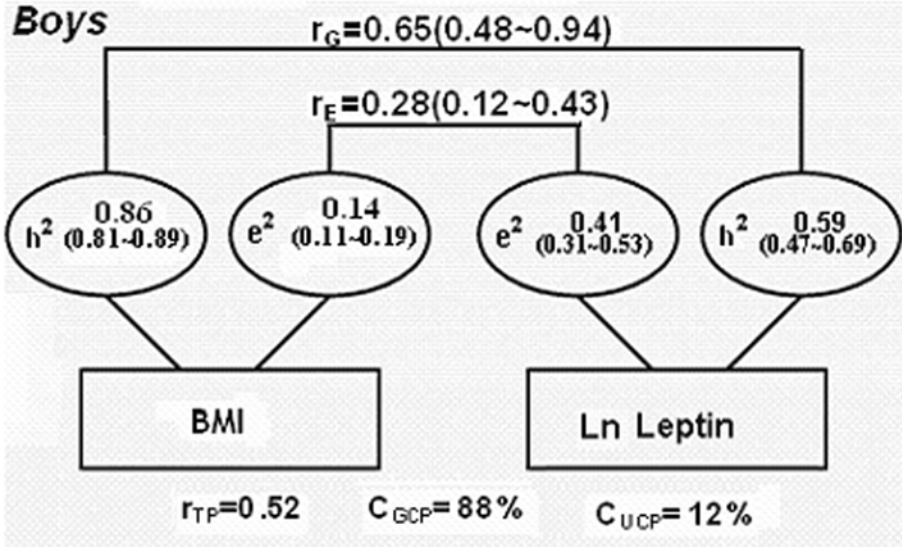

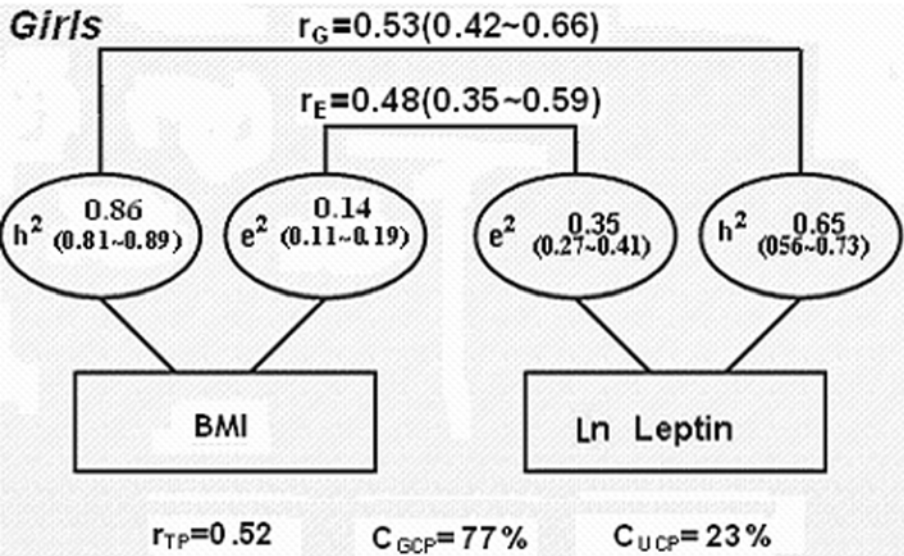

Supplement: jc.2009-1060_1.pdf [file jc.2009-1060_1.pdf]

Boys

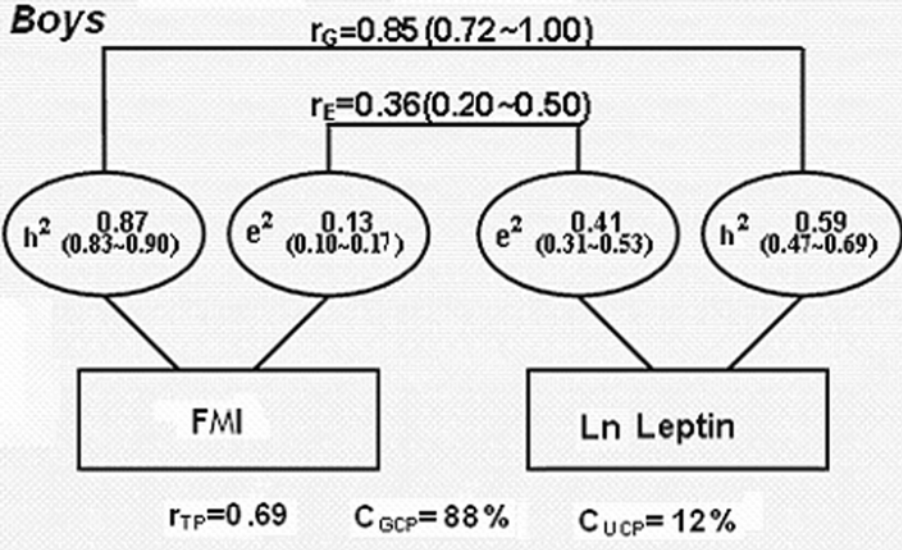

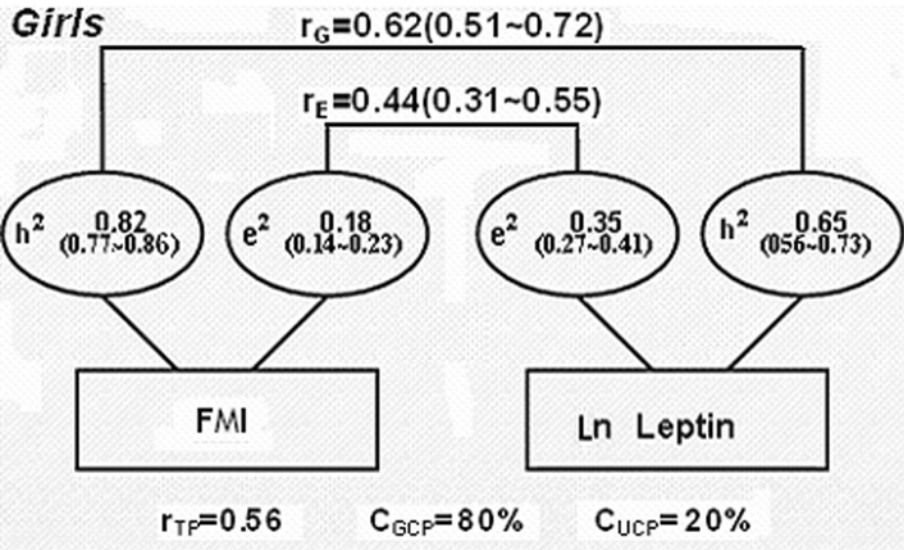

Supplement: jc.2009-1060_2.pdf [file jc.2009-1060_2.pdf]

Boys

$r_G = 0.65(0.48 \sim 0.87)$

$r_E = 0.32(0.16 \sim 0.46)$

$h^2$  0.75  
(0.68-0.81)

$e^2$  0.25  
(0.18-0.32)

$e^2$  0.41  
(0.31-0.53)

$h^2$  0.59  
(0.47-0.69)

WC

Ln Leptin

$r_{TP} = 0.53$

$C_{GCP} = 81\%$

$C_{UCP} = 19\%$

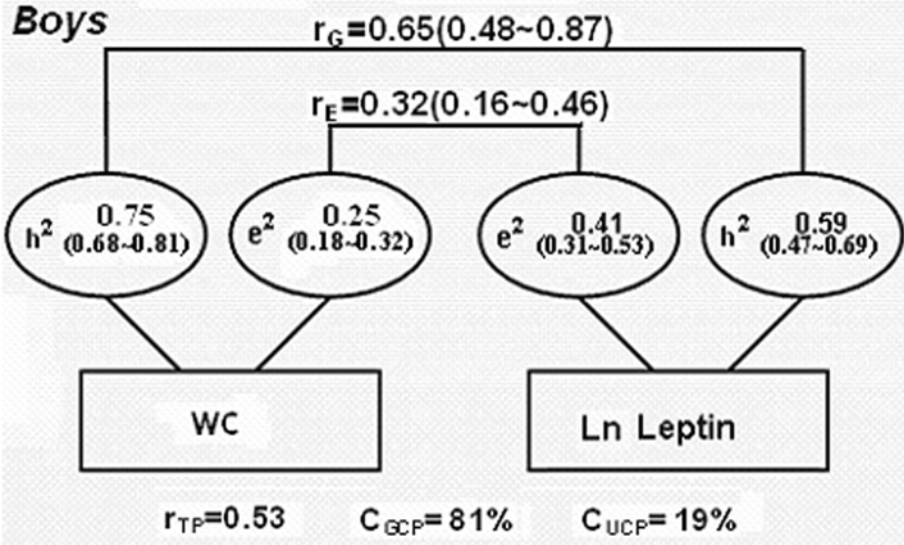

**Girls**

$r_G = 0.57 (0.42 \sim 0.76)$

$r_E = 0.36 (0.22 \sim 0.48)$

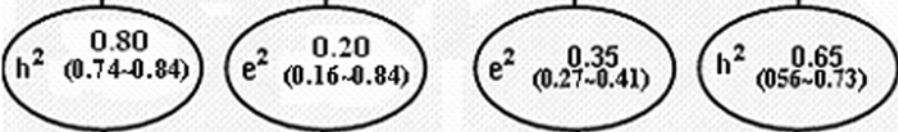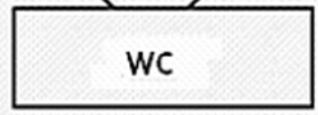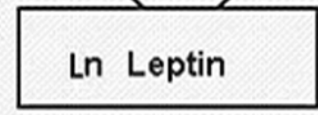

$r_{TP} = 0.51$

$C_{GCP} = 80\%$

$C_{UCP} = 20\%$

Supplement: jc.2009-1060_3.pdf [file jc.2009-1060_3.pdf]

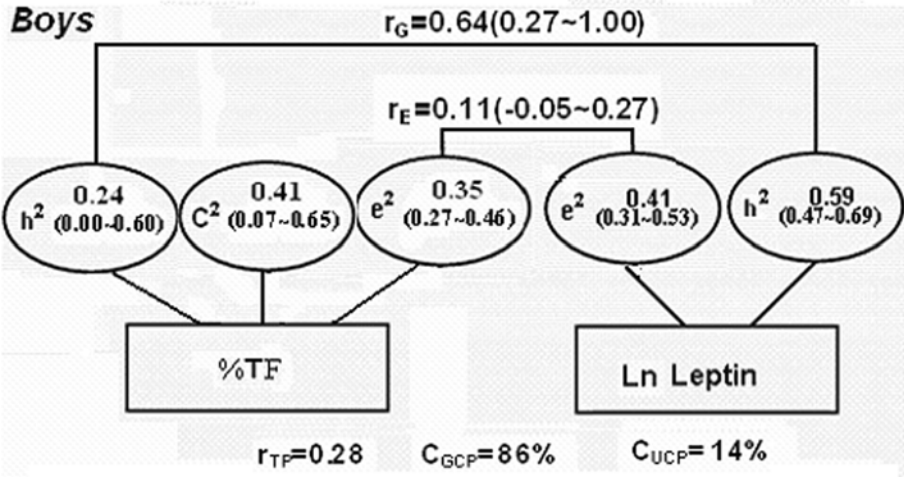

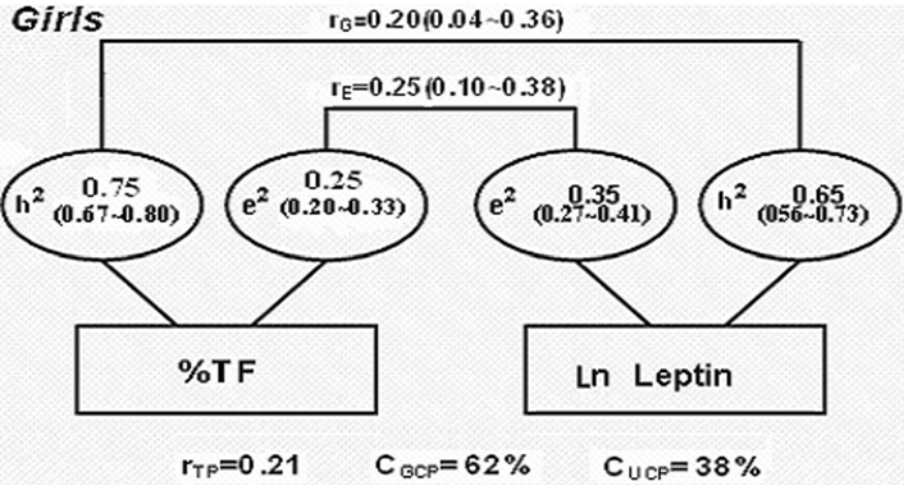

Supplement: jc.2009-1060_4.pdf [file jc.2009-1060_4.pdf]
